# 1 The seasonality of three childhood infections in a pre-industrial society without schools

2 Michael Briga<sup>1,2</sup>, Susanna Ukonaho<sup>1</sup>, Jenni E Pettay<sup>1</sup>, Robert J Taylor<sup>4</sup>, Tarmo Ketola<sup>3</sup>, Virpi  
3 Lummaa<sup>1</sup>

4 <sup>1</sup> Department of Biology, University of Turku, Vesilinnantie 5, 20014 Turku, Finland

5 <sup>2</sup> Infectious Disease Epidemiology Group, Max Planck Institute for Infection Biology,  
6 Charitéplatz 1, Campus Charité Mitte, 10117 Berlin, Germany

7 <sup>3</sup> Department of Biological and Environmental Science, University of Jyväskylä, P.O. Box 35, FI-  
8 40014 Jyväskylä, Finland

9 <sup>4</sup> Department of Science and Environment, Roskilde University, 4000 Roskilde, Denmark

## 10 Abstract

11 **Background:** The burden of many infectious diseases varies seasonally and a better  
12 understanding of the drivers of infectious disease seasonality would help to improve public  
13 health interventions. For directly transmitted highly-immunizing childhood infections, the  
14 leading hypothesis is that seasonality is strongly driven by social gatherings imposed by  
15 schools, with maxima and minima during school terms and holidays respectively. However, we  
16 currently have a poor understanding of the seasonality of childhood infections in societies  
17 without schools and whether these are driven by human social gatherings. Here, we used  
18 unique nationwide data consisting of >40 epidemics over 100 years in 18<sup>th</sup> and 19<sup>th</sup> century  
19 Finland, an agricultural pre-health care society without schools, to (i) quantify the seasonality of  
20 three easily identifiable childhood infections, smallpox, pertussis and measles and (ii) test the  
21 extent to which seasonality of these diseases is driven by seasonal social gatherings.

22 **Methods:** We quantified the seasonality of transmission using time series Susceptible-Infected-  
23 Recovery models, wavelet analyses and general additive mixed models.

24 **Results:** We found that all three infections were seasonal and the seasonality patterns differed  
25 from those in industrialized societies with schools. Smallpox and measles showed high  
26 transmission in the first half of the year, but we could not associate this with seasonal human  
27 gatherings events. For pertussis, however, transmission was higher during social gathering  
28 events such as New Year and Easter.

29 **Conclusions:** Our results show that the seasonality of childhood infections is more variable  
30 than previously described in other populations and indicate a pathogen-specific role of human  
31 social aggregation in driving the infectious disease dynamics.

**NOTE: This preprint reports new research that has not been certified by peer review and should not be used to guide clinical practice.**

32 **Funding:** Academy of Finland (278751, 292368), Nordforsk (104910), the Ehrnrooth  
33 Foundation, the Finnish Cultural Foundation, the University of Turku Foundation and the  
34 Doctoral Programme in Biology, Geography and Geology, University of Turku.

35 **Clinical trial number:** NA

## 36 **1. Introduction**

37 Many infectious diseases are seasonal, in that they tend mostly to circulate during only part of  
38 the year (Altizer et al. 2006; Grassly and Fraser 2006; Bakker et al. 2016; Martinez 2018).  
39 Quantifying this seasonality and identifying its drivers is of interest for our fundamental  
40 understanding of the spatio-temporal dynamics of infectious diseases (Earn et al. 2000; Rohani  
41 et al. 2002; Ferrari et al. 2008) and for public health authorities to develop appropriate  
42 intervention measures (Stone et al. 2007; Cauchemez et al. 2009).

43 In industrialized societies, the leading explanation for the seasonality of many infections such as  
44 measles and influenza is a phenomenon called “school-term forcing,” in which social gatherings  
45 associated with the school term increase transmission (London and Yorke 1973; Fine and  
46 Clarkson 1982; Deguen et al. 2000; Bjørnstad et al. 2002; Cauchemez et al. 2008; Eames et al.  
47 2012). However, the vast majority of studies on the seasonality of childhood infections were  
48 carried out in societies with schools. This can be a limitation because, even though contact is a  
49 necessary condition for transmission, the bias towards societies with schools can obscure co-  
50 variation with other seasonal factors such as climate, other circulating infections and the host’s  
51 immune system (Metcalf et al. 2017). For example, in many industrialized countries, schools are  
52 on holiday between June and September, which are often the hottest and driest months thereby  
53 limiting the transmission of many droplet-mediated childhood infections such as measles and  
54 pertussis.

55 A useful approach to identify the role of seasonal social gathering is to compare the seasonality  
56 of infections before and after the start of systematic schooling, but pre-school data remain rare,  
57 thereby preventing such comparisons, and our understanding of the seasonality of childhood  
58 infections in pre-industrial societies remains poor (Duncan et al. 1996, 1997; Conlan and  
59 Grenfell 2007; Krylova and Earn 2020). Here we report an extensive analysis of a unique  
60 nationwide dataset of numbers of deaths from three childhood infections, smallpox, pertussis  
61 and measles (Table 1), occurring over a span more than 100 years in more than 200  
62 municipalities (parishes) in 18<sup>th</sup> and 19<sup>th</sup> century agricultural Finland. At that time, Finland’s  
63 educational system was characterized by traveling schools (kiertokoulu), whereby an educator  
64 would visit a parish for a few weeks and then travel to a next parish (Tiimonen 2001) and there

65 was essentially no health care (Saarivirta et al. 2012), which allows for a natural spread of  
66 infections.

67 Our first aim was to characterize the seasonality of three childhood infections smallpox,  
68 pertussis and measles in this historical pre-industrial society without schools. Because  
69 education did not have a clear seasonality, we hypothesized that the seasonality of childhood  
70 infections would be different from that of school-term societies in contemporary industrialized  
71 countries. However, pre-industrial Finland did have seasonal social gathering events such as  
72 New Year, Easter and solstice celebrations, and sowing and harvest gatherings (Vilkuna 1950;  
73 Karjalainen 1994). Hence, our second aim was to test the hypothesis that these seasonal social  
74 gathering events drove the observed seasonality of childhood infections (Guyer and Mcbean  
75 1981; Ferrari et al. 2010). To this end, we used time-series Susceptible-Infected-Recovery (tSIR)  
76 models to estimate pathogen transmission rates and then assessed statistically whether weeks  
77 with seasonal social gathering events were associated with higher pathogen transmission.

## 78 **2. Materials and Methods**

### 79 **2.1 Study population and data**

80 Our data on births, deaths and causes of deaths across Finland were originally recorded by  
81 Lutheran priests by the order of the King, and subsequently digitized by the Genealogical  
82 Society of Finland HisKi project, and are available at:  
83 <http://hiski.genealogia.fi/historia/indexe.htm>. The database consists of 5,884,901 individual  
84 births and 3,490,737 individual deaths occurring between 1600 and 1948 in 507 parishes. For  
85 the purpose of the analyses here we focused on the years with most complete birth and causes  
86 of death data, i.e. between 1750 and 1850. This period can be characterized as pre-industrial,  
87 with primitive agricultural technology and limited health care, high birth and death rates  
88 (Holopainen and Helama 2009; Saarivirta et al. 2012) and an increase in population size from  
89 425,700 to 1,628,900 individuals (Official Statistics of Finland 2018).

90 We selected those parishes without missing years in the data and below the Arctic circle  
91 ( $66^{\circ}33'47.1''$ ). The parish areas above the Arctic Circle were different in many ways, with  
92 smaller population sizes occupying vast geographic areas mostly consisting of Saami, a nomadic  
93 population of reindeer herders who depended on fishing and hunting for their livelihood with  
94 little or no agriculture (Itkonen 1948). Based on these criteria, we used data from 215 parishes,  
95 located in 'southern' Finland containing 1,693,056 birth and 1,193,072 death records, which  
96 covered 50% (interannual SD: 5%) of the Finnish population recorded in this period (Pitkänen  
97 2007; Official Statistics of Finland 2018; Voutilainen et al. 2020). For more information on these  
98 parishes and their mortality due to childhood infections see Ketola et al. (2021).

99 In the historical parish records, identification of the death causes was done by the parish  
100 priests. The historical records contain 51,075 causes of death, recorded in Swedish, Finnish or  
101 German. Identification of the causes of interest was first done by classifying causes according to  
102 their spelling similarity, their synonyms in different languages and following (Vuorinen 1999).  
103 This was done by two investigators independently (M.B and T.K.) and resulted in a consistent  
104 outcome with the same causes of death being attributed to smallpox, pertussis and measles.  
105 Using this protocol, we identified 70,704 deaths due to smallpox, 46,259 due to pertussis and  
106 22,646 due to measles and these are the data we used in the manuscript (Table 1, Fig. 1).

107 We chose three infections: the viral infections smallpox and measles and the bacterial infection  
108 pertussis (Table 1; Anderson and May 1991). We chose these three infections for five reasons.  
109 First, the identification of the death causes was done by the parish priests and smallpox,  
110 pertussis and measles are straightforward to diagnose: smallpox and measles have  
111 characteristic rashes and pertussis has a distinct cough. Second, all three infections are  
112 transmitted either through direct contact or via droplets (Benenson 1981). Third, the three  
113 infections have similar generation times (~the latent plus infectious period, Anderson and May  
114 1991), i.e. two weeks for smallpox and measles and four weeks for pertussis. Fourth, in our  
115 population, these infections affected mostly young children also in historical Finns, with a mean  
116 age at death of 1.5 years for pertussis (95% CI: 0.5-8.5), 2.9 years for measles (95% CI: 0.5-13.5)  
117 and 3.8 years for smallpox (95% CI: 0.5-18.5). Fifth, these three infections were leading causes  
118 of childhood mortality in 18<sup>th</sup> and 19<sup>th</sup> century Finland (Table 1, Fig. 1).

119 We obtained the timing of seasonal social gathering events in 18<sup>th</sup> and 19<sup>th</sup> century Finland from  
120 two reference works (Vilkuna 1950; Karjalainen 1994). Because the descriptions of social  
121 gathering events are qualitative rather than quantitative, two investigators (J.P. & S.U.)  
122 independently identified the weeks during which these events occurred. The two  
123 determinations were consistent with each other, finding five periods of recurring seasonal  
124 social gatherings: (i) Christmas and New Year celebrations (weeks 1 and 52), (ii) Midwinter  
125 (laskiainen; weeks 5 to 9), (iii) the late-winter and spring gatherings of Easter, Walpurgis Night,  
126 Pentecoste and Midsummer solstice (weeks 12 to 25), (iv) the summer harvest (weeks 28 to 32)  
127 and (v) the autumn harvest (weeks 39 to 44). The seasonal social gatherings are shown as  
128 intervals because the week at which they occurred can vary between years. Similarly, for (iii)  
129 the spring gathering event, we merged Easter, Walpurgis Night, Pentecoste and Midsummer  
130 solstice into one seasonal event because their interannual variation in weeks of occurrence  
131 often overlap.

## 132 2.2 Data analysis

### 133 2.2.1 General approach

134 In this study we had two aims. First, we identified whether the three childhood infections show  
135 seasonality (Aim 1). Second, we tested whether weeks with seasonal social gatherings have  
136 increased infectious disease transmission (Aim 2). To accomplish these two aims, we used three  
137 methods: (i) we estimated the seasonality of transmission rates from time-series Susceptible-  
138 Infected-Recovery (tSIR) models, (ii) to provide an independent confirmation of the tSIR results  
139 in (i) we repeated the analysis using wavelet analyses, and (iii) we tested whether weeks with  
140 seasonal social gatherings have increased infectious disease transmission using general additive  
141 models (GAMs).

#### 142 2.2.2 Method 1: Identifying infectious disease seasonality using tSIR-models

143 To estimate variation in disease transmission per era, we used the time-series susceptible-  
144 infected-recovered (tSIR) model as developed in Bjørnstad et al. (2002). To fit the tSIR model to  
145 the data, we followed previously established techniques which are implemented in R version  
146 4.0.2 (R Core Team 2020) with the function ‘estpars’ of the package ‘tsir’ (Becker and Grenfell  
147 2017). In brief, in the tSIR model the population is divided into Susceptibles S, Infected I and  
148 Recovered R. The parameter of interest is the transmission factor  $\beta$ , which captures the rate at  
149 which individuals transfer from the S to I and hence transmit the infection. The time series  
150 approach divides time in discrete steps which reflect the diseases’ generation time, which is two  
151 weeks for smallpox and measles and four weeks for pertussis (Anderson and May 1991). It is  
152 possible that there is a time lag between onset of disease and death, which we did not include in  
153 the tSIR models. While having an estimate of such time lag from historical pre-industrial  
154 societies is difficult, we note that tSIR models with generation times that were two weeks longer  
155 than those presented here, a time possible lag in infants as indicated by some studies on  
156 smallpox and pertussis in 20<sup>th</sup> century industrialized societies (Downie et al. 1969; Centers for  
157 Disease Control and Prevention 2002), gave results consistent with those presented here.

158 To estimate  $\beta$ , we first reconstructed the susceptible dynamics. At each time step, the number of  
159 susceptibles  $S_t$  fluctuates around a mean  $S_m$  such that  $S_t = S_m + Z_t$ . Based on pre-vaccination data  
160 from the United Kingdom,  $S_m$  was fixed at 0.035 (Bjørnstad et al. 2002; Becker and Grenfell  
161 2017). Note however that analyses with other values of  $S_m$  (0.015-0.15) gave conclusions  
162 consistent with those presented here (results not shown). The deviation of susceptibles  $Z_{t+1}$  at  
163 each time step is then given by:

$$164 \quad -Z_{t+1} = Z_t + B_t - \rho_t I_t \quad (1)$$

165  $B_t$  and  $I_t$  are the number of births and infected respectively as given by the data.  $\rho_t$  is a time  
166 varying correction factor for underreporting. However, because our data reports only deaths,  $\rho_t$   
167 here is a combined measure of underreporting and fatality rate. It can be estimated using the  
168 regression between cumulative births and cumulative observed cases. Given these parameters,

169 the dynamics of the deviation susceptibles  $Z_{t+1}$  can be estimated by the residuals of the  
170 regression model in (1), which for small populations as in pre-industrial Finland, is best  
171 captured by a Gaussian process (Caudron et al. 2015).

172 Following the tSIR model, the infection dynamics at each time step can be described by:

$$173 \log(E[I_{t+1}]) = \log(\beta) + \alpha \log(I_t) + \log(S_m + Z_t) \quad (2)$$

174 where the expected number of infected individuals  $E[I_{t+1}]$  is given by the data.  $\alpha$  is a correction  
175 factor that accounts for the discretization of a continuous time process and for inhomogeneous  
176 population mixing. We here fixed  $\alpha=0.97$ , a common value that impacts transmission dynamics  
177 independently of epidemic size (Bjørnstad et al. 2002; Caudron et al. 2015; Becker and Grenfell  
178 2017). Note that minor variations in  $\alpha$  values (0.95-0.99) gave results that are consistent with  
179 those reported here. In equation (2) the only remaining unknown parameter is  $\beta$ , which can be  
180 estimated at each time point as the residuals of the regression of  $\log(E[I_{t+1}])$  on  $\log(I_t)$  with  $\log$   
181  $(S_m + Z_t)$  as an offset. For this regression, we used a generalized linear model with a Gaussian  
182 distribution and log link function (Caudron et al. 2015) but other distributions gave conclusions  
183 that are consistent with those reported here (results not shown).

#### 184 2.2.3 Method 2: Confirming the results of Method 1 using wavelet analyses

185 To provide an independent statistical test of the seasonality of infectious diseases, we  
186 performed wavelet analyses. In brief, wavelet analysis decomposes time series data using  
187 functions (wavelets) simultaneously as a function of both period and time, thereby making it  
188 possible to detect changes in periodicity, such as annual seasonality, over time (Cazelles et al.  
189 2007). We pooled the data into monthly intervals and tested periods between six and 18  
190 months with 12 months showing annual seasonality. To determine statistical significance, we  
191 compared the periodicity of the data with that of 1000 'white noise' datasets with significance at  
192 the 5% level. We performed wavelet analyses following (Cazelles et al. 2007; Roesch and  
193 Schmidbauer 2018), in which we log-transformed (+1) the monthly data and fitted a Morlet  
194 wavelet with the function 'analyze.wavelet' using the package 'WaveletComp' (Roesch and  
195 Schmidbauer 2018).

#### 196 2.2.4 Method 3: Identifying drivers of infectious disease seasonality using general additive 197 models

198 To statistically test whether transmission rates were higher during weeks of seasonal social  
199 gatherings events we started off with a trivariate (smallpox, pertussis, measles) general additive  
200 model (GAM) using the function 'gamm' from the package 'mgcv' (Woods et al. 2016; Woods  
201 2017). We determined the 'statistical significance' of terms and models based on (i) the model  
202 selection approach using the second order Akaike's Information Criterion (AICc) and (ii) classic

203 p-values. Model fitting should be considered as a continuum for which alternative models within  
204  $4 \Delta AICc$  are plausible and become increasingly equivocal up to  $14 \Delta AICc$ , after which they  
205 become implausible (Burnham and Anderson 2002; Burnham et al. 2011). We also checked the  
206 terms p-values at  $p=0.05$ .

207 In our models, the dependent variable was the infection's transmission rates estimated from the  
208 tSIR-model. To capture the interannual variance in the transmission of infection, we estimated  
209 the transmission coefficients from tSIR analyses in four-year intervals. We chose four-year  
210 intervals because it was the shortest time interval between epidemics (Fig. 1, Briga et al.  
211 unpublished), but note that analyses with any intervals up to 16 years (25% of the sample size)  
212 gave conclusions consistent with those presented here (results not shown). We also ran all  
213 analyses with four-year running means, which also gave conclusions consistent with those  
214 presented here (results not shown). To avoid that some years influenced the results more than  
215 others, we standardized all transmission rates to an annual mean of zero and, to avoid that the  
216 results be driven by a few influential some seasonal maxima, we log-transformed (+1) all  
217 transmission rates.

218 We had two types of predictor variables in our GAM models. First, we included 'social', a six-  
219 level factor that reflected whether the week belonged to either one of the five aforementioned  
220 seasonal social gathering events or was 'asocial'. Second, because human seasonal social  
221 gatherings correlate with seasonal climatic cycles (e.g., agricultural activities are inevitably  
222 climate bound and social activity may be greater during summer) we tested whether the effect  
223 of social gathering events on transmission remained statistically significant when including  
224 gradual cyclic changes by adding the predictor variable 'daylength' as a smoothed term using  
225 cubic regression splines (note that any spline gave conclusions consistent with those shown  
226 here). We obtained the daylength data from 1750 until 1850 at the location of Helsinki from the  
227 US National Oceanic and Atmospheric Administration (NOAA) daylength calculator at  
228 <https://gml.noaa.gov/grad/solcalc/index.html>.

229 We started off our GAM models with a trivariate analysis to capture a possible covariation  
230 between dependent variables. However, because multivariate GAMs do not allow inclusion of  
231 random terms or temporal autocorrelation of the time series, we performed follow-up  
232 univariate analyses including temporal autocorrelation as an auto-regressive factor of the order  
233 one ( $corAR1$ ;  $-17.4 < \Delta AICc < -79.7$ ) and year as a random intercept even though it provided a  
234 somewhat worse model fit ( $\Delta AICc = +2$  for all infections). The co-variation between the  
235 transmission rates of all three infections remained low ( $< 0.1$  in the best fitting model in Table  
236 S1) and conclusions from multivariate and univariate analyses were always consistent, though

237 multivariate models were often more conservative than univariate models (Tables S1 & S2), and  
238 we formulated our conclusions based on the most conservative approach. We tested a variety of  
239 smoothing functions, which gave consistent results and here we present all models using cubic  
240 splines 'cs'. Model residuals fulfilled all assumptions as controlled with the functions 'resid' and  
241 'gam.check' from the package 'mgcv' (Woods et al. 2016; Woods 2017).

### 242 **3. Results**

#### 243 *3.1 Aim 1: To what extent do smallpox, pertussis and measles show seasonality?*

244 At least a dozen epidemics of each of the three infections (smallpox, pertussis and measles)  
245 occurred between 1750 and 1850 (Table 1, Fig. 1). Because public health interventions may  
246 change the seasonality of infections, we quantified the seasonality of infections into two eras:  
247 before and after the introduction of the smallpox vaccine, respectively from 1750 until 1801 and  
248 from 1802 until 1850. Although there were no vaccines for pertussis and measles at that time,  
249 we nonetheless preferred to use the two eras for these infections as well because of possible  
250 interactions between infections (Rohani et al. 2003).

251 We found evidence of seasonality for all three infections in both eras (Fig. 2, Fig. S1, Fig. S2). For  
252 smallpox and measles, transmission (i.e.  $\beta$  in the tSIR models) was generally higher in the first  
253 half of the year than the second, in both eras (Fig. 2A & 2C, Fig. S1A & C). For smallpox in the  
254 pre-vaccine era, transmission in the first half of the year was 6% higher than the era mean,  
255 while in the vaccine era the change was larger at 19% higher than the era mean (Fig. 2A, Fig.  
256 S1A). For measles, transmission in the first half of the year was 19% and 3% higher relative to  
257 the pre-vaccine and vaccine era means, respectively (Fig. 2C, Fig. S1C). In both eras, the highest  
258 transmission occurring during week 16 with maxima at or close to 60% higher than the era  
259 means (Fig. 2C, Fig. S1C). For smallpox and measles, some of the seasonal maxima were larger  
260 than the 95% CI around the eras' mean transmission (Fig. S1A & C), indicating statistically  
261 significant seasonality and this was confirmed through wavelet analyses (Fig. S2A & C).

262 The seasonality of pertussis was different than that of the two other infections. In both eras,  
263 transmission increased around New Year, in late March/April and in August/September (Fig.  
264 2B, Fig. S1B). Some of the seasonal maxima were larger than the 95% CI around the eras' mean  
265 transmission (Fig. S1B), indicating statistically significant seasonality and this was confirmed  
266 through wavelet analyses (Fig. S2B). Hence, all three infections were seasonal, but the  
267 seasonality of pertussis was different from that of smallpox or measles.

#### 268 *3.2 Aim 2: Is the seasonality of smallpox, pertussis and measles driven by human social gathering?*



269 Next, we tested the hypothesis that the transmission of childhood infections was higher during  
270 weeks of seasonal social gathering. In our study population, we identified five periods with  
271 seasonal social gathering events (grey weeks in Fig. 3), for a total of 32 out of 52 weeks (62%)  
272 having recurring social gathering events. These data require statistical testing for at least three  
273 reasons. First, we separated the dataset in two eras, and while this may be justified from a  
274 public health perspective, it remains unclear whether the introduction of the smallpox vaccine  
275 and the changing demography of the growing population affected the seasonality of childhood  
276 infections. Second, differently from school-term studies, where schooling occurs in relatively  
277 standardized conditions, the social gathering events in this study differed for example in their  
278 importance, group size, whether they were celebrated indoor vs. outdoor and some might  
279 increase transmission more than others. Third, seasonal social gatherings can correlate with  
280 seasonal changes in climate and we should control to what extent social events are confounded  
281 with seasonal changes in climate. To address these challenges, we estimated tSIR-based  
282 transmission rates in four-year intervals and tested statistically whether transmission rates  
283 were higher during social gathering events using GAMs.

284 The results did not support increased transmission of smallpox and measles during weeks with  
285 social gathering events (smallpox:  $\Delta\text{AICc}=+9.6$ ,  $p=0.85$ , model 37 in Table S1,  $\Delta\text{AICc}=+9.4$ ,  
286  $p=0.82$ , Table S2; measles:  $\Delta\text{AICc}=+4.7$ ,  $p=0.09$ , model 57 in Table S1;  $\Delta\text{AICc}=+1.8$ ,  $p=0.13$ , Table  
287 S2). Furthermore, support for a gradual seasonal cycle was inconclusive at best, i.e. models with  
288 the daylight term were within 4 AICc of models without and the p-values for the daylight term  
289 in all these models were  $>0.05$  (smallpox:  $\Delta\text{AICc}=+2.2$ ,  $p=0.96$ , model 21 in Table S1,  
290  $\Delta\text{AICc}=+1.8$ ,  $p=0.12$  in Table S2; measles:  $\Delta\text{AICc}=-1.9$ ,  $p=0.12$ , model 53 in Table S1,  $\Delta\text{AICc}=+2.0$ ,  
291  $p=0.20$  in Table S2). For neither infection did we find statistical support for era-specific  
292 seasonality ( $\Delta\text{AICc}=+2.0$ ,  $p=0.99$ , Table S2A & C), era-specific social gathering effects  
293 ( $\Delta\text{AICc}>+10.1$ ,  $p>0.54$ , Table S2A & C) or era-specific daylight effects ( $\Delta\text{AICc}=+4.0$ ,  $p>0.34$ , Table  
294 S2A & C).

295 In contrast, pertussis showed increased transmission at the end of December and early January,  
296 i.e. New Year (weeks 52 and 1, Fig. 3B), in late March and April (weeks 12 to 16, coinciding with  
297 Easter, Fig. 3B) and in August and September (weeks 32 to 40, Fig. 3B). The New Year maximum  
298 occurred as an abrupt rather than gradual event, i.e. on top of the smooth term (multivariate:  
299  $\Delta\text{AICc}=-18.7$ ,  $p=0.0046$ , model 53 in Table S1; univariate:  $\Delta\text{AICc}=-7.4$ ,  $p=0.01$ , Table S2; Fig. 3B,  
300 Fig. S3A), but the latter two transmission periods were better described by a gradual cycle (i.e. a  
301 smooth term) rather than an abrupt event (multivariate:  $\Delta\text{AICc}=-114.8$ ,  $p<2e^{-16}$ , model 53 in  
302 Table S1; univariate:  $\Delta\text{AICc}=-23.3$ ,  $p<e^{-8}$ , Table S2; Fig. S3B & C). The gradual seasonal cycle was  
303 at its lowest during early summer and early winter (Fig. S3C) and hence does not show the

304 summer-winter gradient we would expect from a uniquely climate driven seasonal  
305 phenomenon. The winter minimum in the smooth term did not cause the statistically significant  
306 increase in transmission during New Year as this increase remained statistically significant in a  
307 model without seasonal cycle (multivariate:  $\Delta AICc = -11.8$ ,  $p = 0.0017$ , models 63 vs. 64 in Table  
308 S1; univariate:  $\Delta AICc = -8.8$ ,  $p = 0.004$  in Table S2B). We found no statistical support for era-  
309 specific seasonality ( $\Delta AICc = +34.0$ ,  $p = 0.97$ , Table S2B), era-specific social gathering effects  
310 ( $\Delta AICc = +35.1$ ,  $p = 0.94$ , Table S2B) or era-specific daylight effects ( $\Delta AICc = +37.1$ ,  $p = 0.01$ , Table  
311 S2B). Thus, pertussis showed three seasonal maxima during New Year, in late March/April and  
312 in August/September, and the New Year maximum was abrupt, while the March/April and  
313 August/September maxima were gradual.

#### 314 **4. Discussion**

315 In this study we quantified the seasonality of three childhood infections in a pre-industrial  
316 society without schools, 18<sup>th</sup> and 19<sup>th</sup> century Finland. For all three infections, we detected  
317 statistically significant seasonality. For smallpox and measles, transmission was higher in the  
318 first half of the year than in the second half, but we found no evidence that this seasonality was  
319 associated with social gathering events. In contrast, pertussis transmission increased at (i) the  
320 end of December and early January, (ii) in March and April and (iii) in August and September.  
321 The first two maxima were associated with the social gathering events New Year and Easter.  
322 Here we discuss the implications of our results for the seasonality and dynamics of infectious  
323 diseases in general and of childhood infections in particular.

324 A large body of work on the seasonality of measles in pre-vaccine Europe and in contemporary  
325 industrialized societies found higher transmission in winter, spring and autumn and minima  
326 during spring and summer breaks, indicating that seasonality is driven by school term-forcing  
327 (Bjørnstad et al. 2002; Metcalf et al. 2009; Mahmud et al. 2017; Klinkenberg et al. 2018). Our  
328 results show that two hundred years earlier, the seasonality of measles was very different from  
329 that in contemporary industrialized European societies with school terms. Measles showed  
330 increased transmission in the first half of the year without association with seasonal social  
331 gathering events. We believe that the lack of association with social gathering events is because  
332 Finland in the 18<sup>th</sup> and 19<sup>th</sup> century can best be described as a meta-population, with different  
333 regions of Finland regularly being disconnected from one another and from neighboring  
334 countries. In this meta-population, infections would often experience local or even nation-wide  
335 extinctions (Fig. 1), only to be re-introduced from other regions in Finland or from abroad. In  
336 such a scenario, the seasonality of measles could be driven by larger-scale human movement,  
337 with the increased early-year transmission (Fig. 2) being driven by the start of human  
338 movement after harsh winters during which susceptibles accumulated. Similar larger-scale

339 seasonal human movements driving the seasonality of measles have been described, for  
340 example, in Niger, a contemporary largely agricultural based society (Ferrari et al. 2010; Bharti  
341 et al. 2011). We suggest that the seasonal dynamics of measles in our population could reflect a  
342 similar phenomenon.

343 We know almost nothing on the seasonality of smallpox epidemics (Krylova and Earn 2020). A  
344 recent study on the seasonality of smallpox mortality in London indicated a weak seasonal  
345 trend from summer in the 1700's that gradually moved towards winter in the 1800's (Krylova  
346 and Earn 2020). Our results quite differ from those in London in the same period, with smallpox  
347 transmission being predominantly in the first half of the year, a seasonality consistent with that  
348 of measles (Fig. 2). Interestingly, in the 18<sup>th</sup> and early 19<sup>th</sup> smallpox in London was endemic  
349 (Duncan et al. 1994; Krylova and Earn 2020). This is different from the situation in the Finnish  
350 meta-population and we believe that the seasonality of smallpox is driven by the same dynamics  
351 as that of measles, namely early-year introductions from neighboring regions through large-  
352 scale human movement.

353 In contrast to the predictable seasonality of measles, the seasonal dynamics of pertussis in  
354 contemporary industrialized societies are more stochastic, with a seasonality that does not  
355 match periods of school-term aggregation well (Farizo et al. 1992; Rohani et al. 2002;  
356 Skowronski et al. 2002; Metcalf et al. 2009). In North America there appears to be a dominant  
357 seasonality during August, September or in winter (Skowronski et al. 2002; Fisman et al. 2011).  
358 In England, seasonality moved from July or August in the 1940's and 1950's to October and  
359 December in the 1960's and 1970's (Fine and Clarkson 1986). Our results are different from  
360 these earlier studies in that we found increased transmission around New years and in late  
361 March/April, which matched the New Year and Easter social gatherings respectively. However,  
362 we also found a maximum from August until October (Fig. 3) and this is consistent with many  
363 previous studies, even in contemporary societies with a relatively high vaccination coverage  
364 (Farizo et al. 1992; Skowronski et al. 2002; Metcalf et al. 2009). In our study, the timing of that  
365 maximum did not match any seasonal social gathering events, which occurred either before or  
366 after the maximum in transmission (Fig. 3) and even though that seasonal maximum remains as  
367 yet unexplained (Kilgore et al. 2016; Martinez 2018), our result considerably broadens the  
368 consistency of this seasonal pattern across time and societies, supporting a possible association  
369 with some climatic factors such as humidity (Kilgore et al. 2016).

370 It remains puzzling as to why local social gathering events did not drive the seasonality of  
371 measles and smallpox, but did affect the seasonality of pertussis. The difference between these  
372 childhood infections may be caused by several factors and here we bring forward two potential  
373 mechanisms. First, the degree of immunization differs between infections, with immunity to

374 pertussis wanes over time and hence transmission occurring in adults as well (Wendelboe et al.  
375 2005), while smallpox and measles being life-long immunizing (Hammarlund et al. 2003; Griffin  
376 et al. 2012). Because of the waning immunity, pertussis in pre-vaccine eras can often  
377 transmitted by adults (Bisgard et al. 2004), while the other two infections are essentially  
378 transmitted by children (Anderson and May 1991). Such a different age-specificity can drive the  
379 seasonal differences between infections, with for pertussis social gathering events of adults  
380 being more determinant than that of children. A second noteworthy component is that pertussis  
381 is the most transmissible of the three infections. Both pertussis and measles have a high  $R_0$ , the  
382 number of secondary infections deriving from one infected person (Anderson and May 1991), of  
383 16 and 14, respectively (Keeling and Rohani 2011; Guerra et al. 2017). However, the  $R_0$  values  
384 are high for very different reasons. For pertussis, the high value arises from a high transmission  
385 probability per contact. Measles, however, has a generation time half that of pertussis and a  
386 lower transmission probability per contact. Smallpox, with an  $R_0$  of around 6 (Gani and Leach  
387 2001) and a generation time of two weeks, is the infection with the lowest transmission  
388 probability per contact of the three infections studied here.

389 There are at least three limitations to our study. First, the causes of death in historical  
390 records were registered by parish priests, who may or not have the know-how to identify  
391 infections. To this end, we focused our analyses on three easily identifiable causes of death.  
392 Second, individuals might be more likely to die from infections in some seasons rather than  
393 others, irrespective of infection incidence. In the Northern hemisphere, the general pattern is  
394 that mortality gradually increases in winter (Rau 2007). The seasonal infection maxima in our  
395 study did not match that pattern and hence are unlikely to be driven by general seasonality in  
396 mortality. To what extent there is a possible discrepancy between the seasonality of incidence  
397 and mortality in our historical data remains yet unclear, but we are gathering historical  
398 incidence data to investigate the question. Secondly, there can be seasonal variation in access to  
399 health care or registration of information on infectious diseases. We do not believe this to be the  
400 case here, as health care was virtually non-existent and because deaths were recorded by the  
401 parish priests, who were locally-based. However, even though we believe that seasonal  
402 variation in registration of information was limited, it remains possible that for example parish  
403 priests were postponing recording information when they were busy with other activities, such  
404 as New Year or Easter. Interestingly though, for a subset of the data the time lag between death  
405 date and burial date during these two gathering events did not differ from other periods of the  
406 year (results not shown).

407 To conclude, here we provide a quantification of the seasonality of three childhood infections  
408 smallpox, pertussis and measles in a society for which data are rarely available, an 18<sup>th</sup> and 19<sup>th</sup>

409 century pre-industrial European nation. Our results show that the seasonality of infections was  
410 very different from that in 20<sup>th</sup> century industrial societies and emphasize a pathogen-specific  
411 role of local social movements as a driver of infectious disease dynamics.

## 412 **Acknowledgements**

413 The data are the result of years of work by the Genealogical Society of Finland, who kindly  
414 provided access to the data. We thank Jess Metcalf, Alexander Becker and Angi Rösch and the  
415 Nordemics consortium for useful discussions.

## 416 **References**

417 Altizer, S., A. Dobson, P. Hosseini, P. Hudson, and M. Pascual. 2006. Seasonality and the dynamics  
418 of infectious diseases. *Ecology Letters* 9:467–484.

419 Anderson, R. M., and R. May. 1991. *Infectious diseases of humans*. Oxford University Press,  
420 Oxford, UK.

421 Bakker, K. M., M. E. Martinez-Bakker, B. Helm, and T. J. Stevenson. 2016. Digital epidemiology  
422 reveals global childhood disease seasonality and the effects of immunization. *Proceedings of the*  
423 *National Academy of Sciences* 113:6689–6694.

424 Becker, A. D., and B. T. Grenfell. 2017. tsiR: An R package for time-series Susceptible-Infected-  
425 Recovered models of epidemics. *PloS One* 12:e0185528.

426 Benenson, A., ed. 1981. *Control of Communicable Disease in Man* (13th ed.). American Public  
427 Health Association, Washington, DC.

428 Bharti, N., A. Tatem, M. Ferrari, R. Grais, A. Djibo, and B. T. Grenfell. 2011. Explaining seasonal  
429 fluctuations of measles in Niger using nighttime lights imagery. *Science* 334:1424–1428.

430 Bisgard, K. M., F. B. Pascual, K. R. Ehresmann, C. A. Miller, C. Cianfrini, C. E. Jennings, C. A.  
431 Rebmann, et al. 2004. Infant pertussis: Who was the source? *Pediatric Infectious Disease Journal*  
432 23:985–989.

433 Bjørnstad, O. N., B. F. Finkelstädt, and B. T. Grenfell. 2002. Dynamics of measles epidemics:  
434 estimating scaling of transmission rates using a time series SIR model. *Ecological Monographs*  
435 72:169–184.

436 Burnham, K. P., and D. R. Anderson. 2002. *Model selection and multimodel inference: A practical*  
437 *information-theoretic approach* (2nd ed.). Springer-Verlag, New York.

438 Burnham, K. P., D. R. Anderson, and K. P. Huyvaert. 2011. AIC model selection and multimodel  
439 inference in behavioral ecology: Some background, observations, and comparisons. *Behavioral*  
440 *Ecology and Sociobiology* 65:23–35.

- 441 Cauchemez, S., N. M. Ferguson, C. Wachtel, A. Tegnell, G. Saour, B. Duncan, and A. Nicoll. 2009.  
442 Closure of schools during an influenza pandemic. *The Lancet Infectious Diseases* 9:473–481.
- 443 Cauchemez, S., A. J. Valleron, P. Y. Boëlle, A. Flahault, and N. M. Ferguson. 2008. Estimating the  
444 impact of school closure on influenza transmission from Sentinel data. *Nature* 452:750–754.
- 445 Caudron, Q., A. S. Mahmud, C. J. E. Metcalf, M. Gottfredsson, C. Viboud, A. D. Cliff, B. T. Grenfell, et  
446 al. 2015. Predictability in a highly stochastic system: final size of measles epidemics in small  
447 populations. *Journal of the Royal Society Interface* 12:20141125.
- 448 Cazelles, B., M. Chavez, G. Constantin de Magny, J.-F. Guégan, and S. Hales. 2007. Time-dependent  
449 spectral analysis of epidemiological time-series with wavelets. *Journal of The Royal Society*  
450 *Interface* 4:625–636.
- 451 Centers for Disease Control and Prevention. 2002. Pertussis Deaths--United States, 2000.  
452 *Morbidity and Mortality Weekly Report* 51:616–618.
- 453 Conlan, A. J. K., and B. T. Grenfell. 2007. Seasonality and the persistence and invasion of measles.  
454 *Proceedings of the Royal Society B: Biological Sciences* 274:1133–1141.
- 455 Deguen, S., G. Thomas, and N. P. Chau. 2000. Estimation of the contact rate in a seasonal SEIR  
456 model: Application to chickenpox incidence in France. *Statistics in Medicine* 19:1207–1216.
- 457 Downie, A. W., D. S. Fedson, L. S. Vincent, A. R. Rao, and C. H. Kempe. 1969. Haemorrhagic  
458 smallpox. *Journal of Hygiene* 67:619–629.
- 459 Duncan, C. J., S. R. Duncan, and S. Scott. 1996. Whooping cough epidemics in London, 1701-1812:  
460 Infection dynamics, seasonal forcing and the effects of malnutrition. *Proceedings of the Royal*  
461 *Society B: Biological Sciences* 263:445–450.
- 462 Duncan, C. J., S. R. Duncan, and S. Scott. 1997. The dynamics of measles epidemics. *Theoretical*  
463 *Population Biology* 52:155–163.
- 464 Duncan, S. R., S. Scott, and C. J. Duncan. 1994. Modelling the different smallpox epidemics in  
465 England. *Philos.Trans.R.Soc.Lond B Biol.Sci.* 346:407–419.
- 466 Eames, K. T. D., N. L. Tilston, E. Brooks-Pollock, and W. J. Edmunds. 2012. Measured dynamic  
467 social contact patterns explain the spread of H1N1v influenza. *PLoS Computational Biology*  
468 8:e1002425.
- 469 Earn, D. J. D., P. Rohani, B. M. Bolker, and B. T. Grenfell. 2000. A simple model for complex  
470 dynamical transitions in epidemics. *Science* 287:667–671.
- 471 Farizo, K. M., S. L. Cochi, E. R. Zell, E. W. Brink, G. Wassilak, P. A. Patriarca, S. Clinical, et al. 1992.  
472 Epidemiological features of pertussis in the United States, 1980-1989. *Clinical Infectious*

- 473 Diseases 14:708–719.
- 474 Ferrari, M. J., A. Djibo, R. F. Grais, N. Bharti, B. T. Grenfell, and O. N. Bjornstad. 2010. Rural –  
475 urban gradient in seasonal forcing of measles transmission in Niger. *Proceedings of the Royal*  
476 *Society B Biological Sciences* 277:2775–2782.
- 477 Ferrari, M. J., R. F. Grais, N. Bharti, A. J. K. Conlan, O. N. Bjørnstad, L. J. Wolfson, P. J. Guerin, et al.  
478 2008. The dynamics of measles in sub-Saharan Africa. *Nature* 451:679–684.
- 479 Fine, P. E. M., and J. A. Clarkson. 1982. Measles in England and Wales. An analysis of factors  
480 underlying seasonal patterns. *International Journal of Epidemiology* 11:5–15.
- 481 Fine, P. E. M., and J. A. Clarkson. 1986. Seasonal influences on pertussis. *International Journal of*  
482 *Epidemiology* 15:237–247.
- 483 Fisman, D. N., P. Tang, T. Hauck, S. Richardson, S. J. Drews, D. E. Low, and F. Jamieson. 2011.  
484 Pertussis resurgence in Toronto, Canada: A population-based study including test-incidence  
485 feedback modeling. *BMC Public Health* 11.
- 486 Gani, R., and S. Leach. 2001. Transmission potential of smallpox in contemporary populations.  
487 *Nature* 414:748–751.
- 488 Grassly, N. C., and C. Fraser. 2006. Seasonal infectious disease epidemiology. *Proceedings of the*  
489 *Royal Society B Biological Sciences* 273:2541–2550.
- 490 Griffin, D. E., W. H. Lin, and C. H. Pan. 2012. Measles virus, immune control, and persistence.  
491 *FEMS Microbiology Reviews* 36:649–662.
- 492 Guerra, F. M., S. Bolotin, G. Lim, J. Heffernan, S. L. Deeks, Y. Li, and N. S. Crowcroft. 2017. The  
493 basic reproduction number ( $R_0$ ) of measles: a systematic review. *The Lancet Infectious Diseases*  
494 17:e420–e428.
- 495 Guyer, B., and A. M. Mcbean. 1981. The epidemiology and control of measles in Yaoundé,  
496 Cameroun, 1968 - 1975. *International Journal of Epidemiology* 10:263–269.
- 497 Hammarlund, E., M. W. Lewis, S. G. Hansen, L. I. Strelow, J. A. Nelson, G. J. Sexton, J. M. Hanifin, et  
498 al. 2003. Duration of antiviral immunity after smallpox vaccination. *Nature Medicine* 9:1131–  
499 1137.
- 500 Holopainen, J., and S. Helama. 2009. Little ice age farming in Finland: Preindustrial agriculture  
501 on the edge of the Grim reaper’s scythe. *Human Ecology* 37:213–225.
- 502 Itkonen, T. 1948. The lapps of Finland up to 1945, vol.2. Werner Söderström Osakeyhtiö,  
503 Porvoo, Helsinki.
- 504 Karjalainen, S. 1994. Juhlan aika: Suomalaisia vuotuisperinteitä. W Söderström, Helsinki,

- 505 Finland.
- 506 Keeling, M. J., and P. Rohani. 2011. Modeling infectious diseases in humans and animals.  
507 Princeton University Press, Princeton, USA.
- 508 Ketola, T., M. Briga, T. Honkola, M. Vuotillainen, and V. Lummaa. 2021. Town population size and  
509 structuring into villages and households drive infectious disease risks in pre-healthcare Finland.  
510 *Proceedings of Royal Society B Biological Sciences* 288:20210356.
- 511 Kilgore, P. E., A. M. Salim, M. J. Zervos, and H. Schmitt. 2016. Pertussis: microbiology, disease,  
512 treatment, and prevention. *Clinical Microbiology Reviews* 29:449–486.
- 513 Klinkenberg, D., S. J. M. Hahné, T. Woudenberg, and J. Wallinga. 2018. The reduction of measles  
514 transmission during school vacations. *Epidemiology* 29:562–570.
- 515 Krylova, O., and D. J. D. Earn. 2020. Patterns of smallpox mortality in London, England, over  
516 three centuries. *PLoS Biology* 18:1–27.
- 517 London, W. P., and J. A. Yorke. 1973. Recurrent outbreaks of measles, chickenpox and mumps: I.  
518 Seasonal variation in contact rates. *American Journal of Epidemiology* 98:453–468.
- 519 Mahmud, A. S., C. J. E. Metcalf, and B. T. Grenfell. 2017. Comparative dynamics, seasonality in  
520 transmission, and predictability of childhood infections in Mexico. *Epidemiology and Infection*  
521 145:607–625.
- 522 Martinez, M. E. 2018. The calendar of epidemics: Seasonal cycles of infectious diseases. *PLoS*  
523 *Pathogens* 14:e1007327.
- 524 Metcalf, C. J. E., O. N. Bjørnstad, B. T. Grenfell, and V. Andreasen. 2009. Seasonality and  
525 comparative dynamics of six childhood infections in pre-vaccination Copenhagen. *Proceedings*  
526 *of the Royal Society B Biological Sciences* 276:4111–4118.
- 527 Metcalf, C. J. E., K. S. Walter, A. Wesolowski, C. O. Buckee, E. Shevliakova, A. J. Tatem, W. R. Boos,  
528 et al. 2017. Identifying climate drivers of infectious disease dynamics: recent advances and  
529 challenges ahead. *Proceedings of Royal Society B Biological sciences* 284:20170901.
- 530 Official Statistics of Finland. 2018. Available at: [https://www.stat.fi/index\\_en.html](https://www.stat.fi/index_en.html). Accessed:  
531 November 1st.
- 532 Pitkänen, K. 2007. Suomen väestön historialliset kehityslinjat [Historical development of the  
533 Finnish population]. Pages 41–76 in S. Koskinen, T. Martelin, I.-L. Notkola, V. Notkola, K.  
534 Pitkänen, M. Jalovaara, E. Mäenpää, et al., eds. *Suomen väestö* [The Finnish population]. Helsinki  
535 University Press, Helsinki, Finland.
- 536 Rau, R. 2007. Seasonality in human mortality: a demographic approach. Springer-Verlag, Berlin



- 537 Heidelberg.
- 538 Roesch, A., and H. Schmidbauer. 2018. WaveletComp: Computational Wavelet Analysis.
- 539 Rohani, P., C. Green, N. Mantilla-Beniers, and B. Grenfell. 2003. Ecological interference between  
540 fatal diseases. *Nature* 422:885–888.
- 541 Rohani, P., M. J. Keeling, and B. T. Grenfell. 2002. The interplay between determinism and  
542 stochasticity in childhood diseases. *American Naturalist* 159:469–481.
- 543 Saarivirta, T., D. Consoli, and P. Dhondt. 2012. The evolution of the Finnish health-care system  
544 early 19th Century and onwards. *International Journal of Business and Social Science* 3:243–  
545 258.
- 546 Skowronski, D., G. De Serres, D. MacDonald, W. Wu, C. Shaw, J. Macnabb, S. Champagne, et al.  
547 2002. The changing age and seasonal profile of pertussis in Canada. *Journal of Infectious  
548 Diseases* 186:1537–1538.
- 549 Stone, L., R. Olinky, and A. Huppert. 2007. Seasonal dynamics of recurrent epidemics. *Nature*  
550 446:533–536.
- 551 Tiimonen, S. 2001. Valoa kansalle: Luterilainen kirkko ja kansanopetuksen  
552 kehittämisyrittämykset autonomisessa Suomessa 1809–1848. Suomen kirkkohistoriallisen  
553 seuran toimituksia 185. Suomen kirkkohistoriallinen seura, Helsinki.
- 554 Vilkuna, K. 1950. Vuotuinen ajantieto: Vanhoista merkkipäivistä sekä kansanomaisesta talous-  
555 ja sääkalenterista enteillen (25th ed.). Otava.
- 556 Voutilainen, M., J. Helske, and H. Högmänder. 2020. A Bayesian Reconstruction of a Historical  
557 Population in Finland, 1647–1850. *Demography* 57:1171–1192.
- 558 Vuorinen, H. S. 1999. Suomalainen tautinimistö ennen bakteriologista vallankumousta.  
559 *Hippokrates* 33–61.
- 560 Wendelboe, A. M., A. Van Rie, S. Salmaso, and J. A. Englund. 2005. Duration of immunity against  
561 pertussis after natural infection or vaccination. *Pediatric Infectious Disease Journal* 24:58–61.
- 562 Woods, S. 2017. *Generalized Additive Models. An Introduction with R (Second Ed.)*. Chapman &  
563 Hall, Boca Raton, Fl.
- 564 Woods, S., N. Pya, and B. Safken. 2016. Smoothing parameter and model selection for general  
565 smooth models (with discussion). *Journal of the American Statistical Association* 111:1548–  
566 1575.
- 567

568 Table 1. Overview of the infections in this study, with their sample sizes before and after the  
 569 start of the smallpox vaccination program, respectively the pre-vaccine era (1750-1801) and  
 570 vaccine era (1802-1850).

| <b>Infection</b> | <b>Smallpox</b> |           | <b>Pertussis</b> |           | <b>Measles</b> |           |
|------------------|-----------------|-----------|------------------|-----------|----------------|-----------|
| pathogen         | virus           |           | bacteria         |           | virus          |           |
| generation time  | 2 weeks         |           | 4 weeks          |           | 2 weeks        |           |
| immunization     | long-lasting    |           | waning           |           | long-lasting   |           |
| vaccination      | vaccine         |           | none             |           | none           |           |
| Sample size      | 1750-1801       | 1802-1850 | 1750-1801        | 1802-1850 | 1750-1801      | 1802-1850 |
| N deaths         | 39,082          | 30,629    | 14,385           | 31,175    | 7,429          | 15,153    |
| N deaths/year    | 752             | 638       | 277              | 649       | 143            | 316       |

571

572

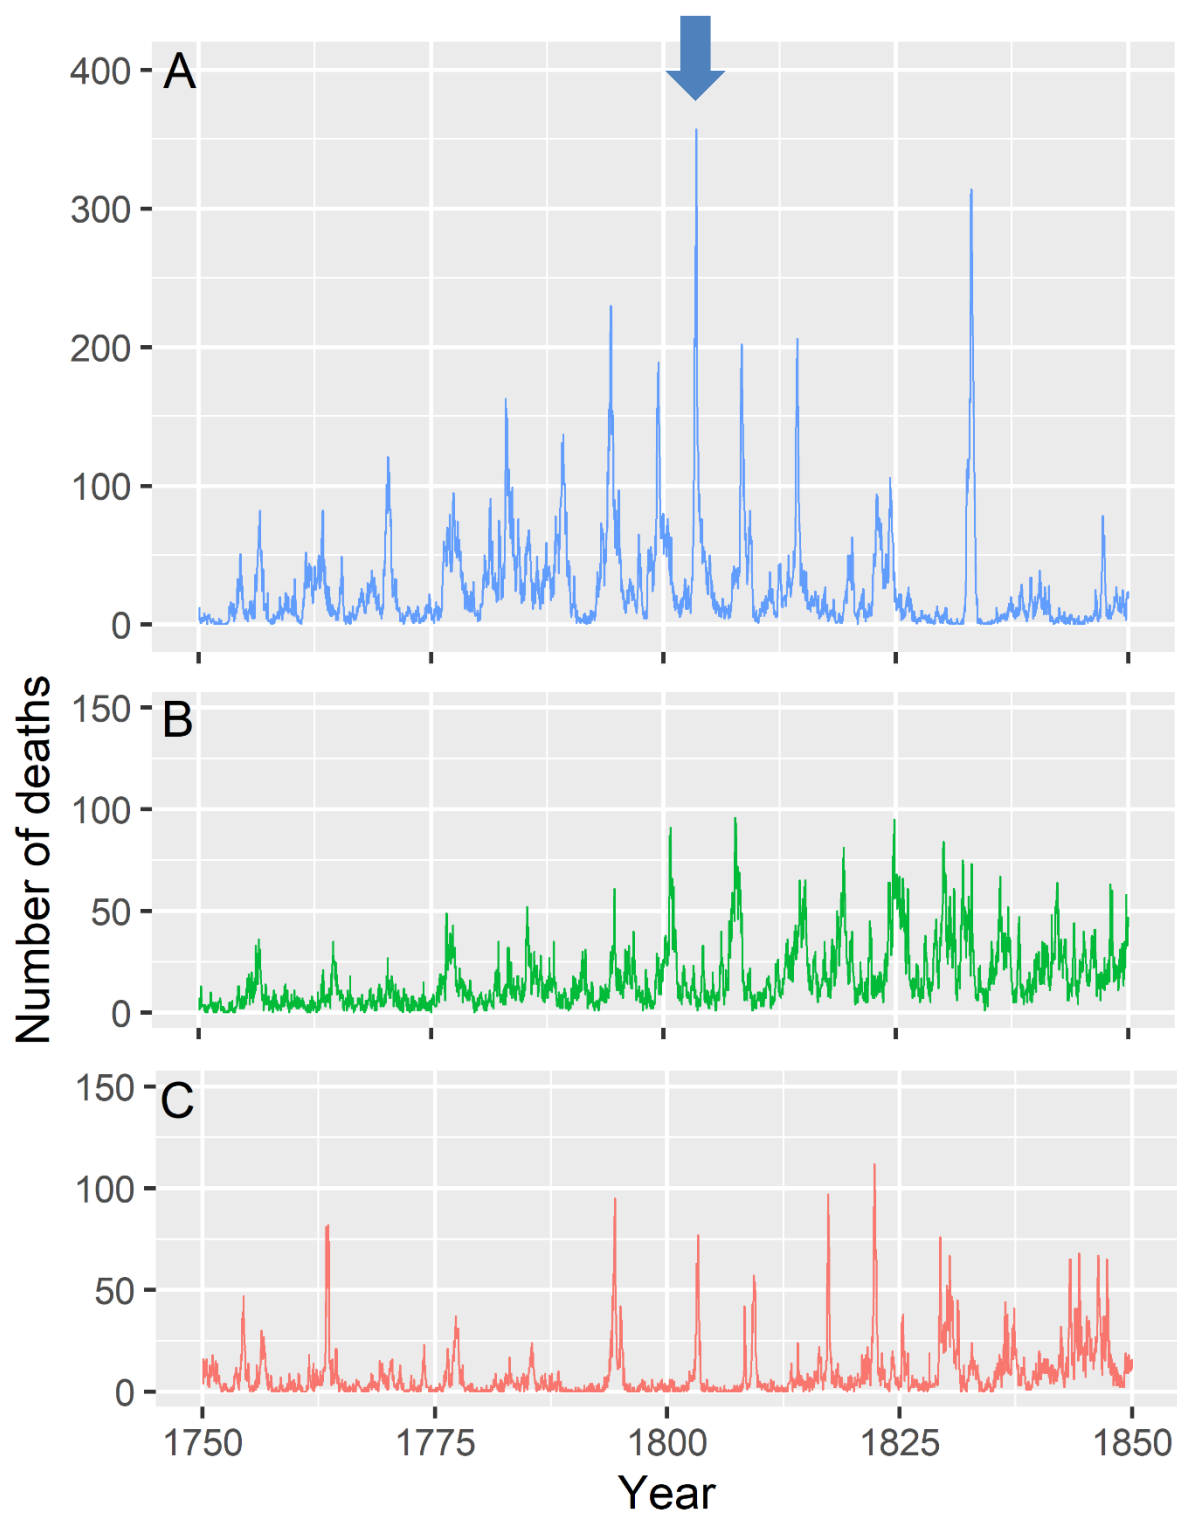

573

574 Fig. 1 Bi-weekly counts smallpox, pertussis and measles deaths showing over 40 recurrent  
575 epidemics of between 1750 and 1850 in Finland. Blue arrow indicates the start of the smallpox  
576 vaccination programme in Finland in 1802, but for the other infections there was no vaccine  
577 available at the time. Note the different Y-axes between A and B or C.

578

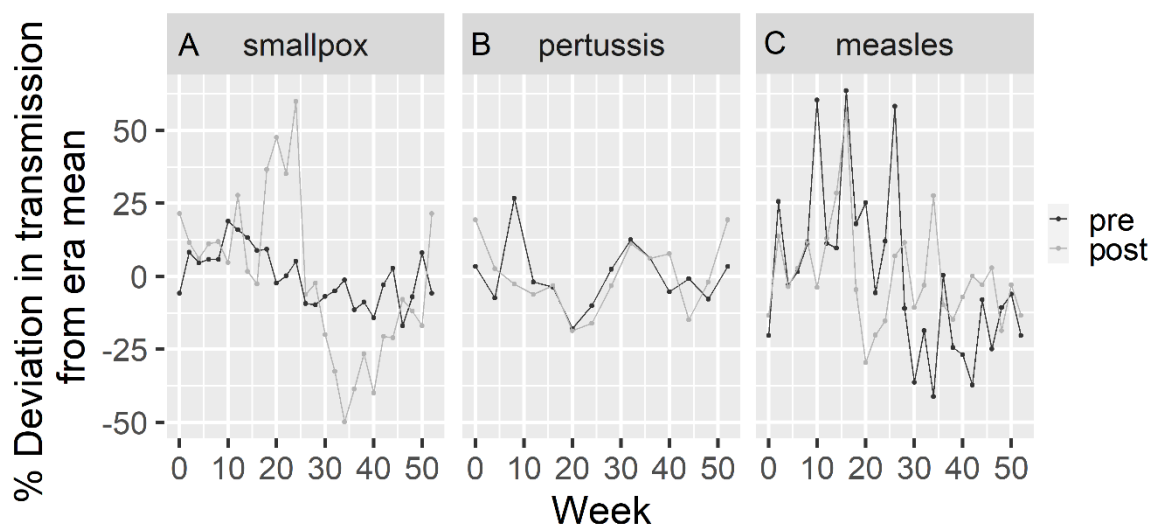

579

580 Fig. 2 Seasonal deviation from the era's mean transmission for (A) smallpox, (B) pertussis and  
581 (C) measles. 'Pre' and 'post' indicate respectively before and after the start of the smallpox  
582 vaccination programme in 1802. Note that for pertussis and measles there was no vaccine  
583 during our study period. See Fig. S1 for untransformed transmission values with 95% CI.

584

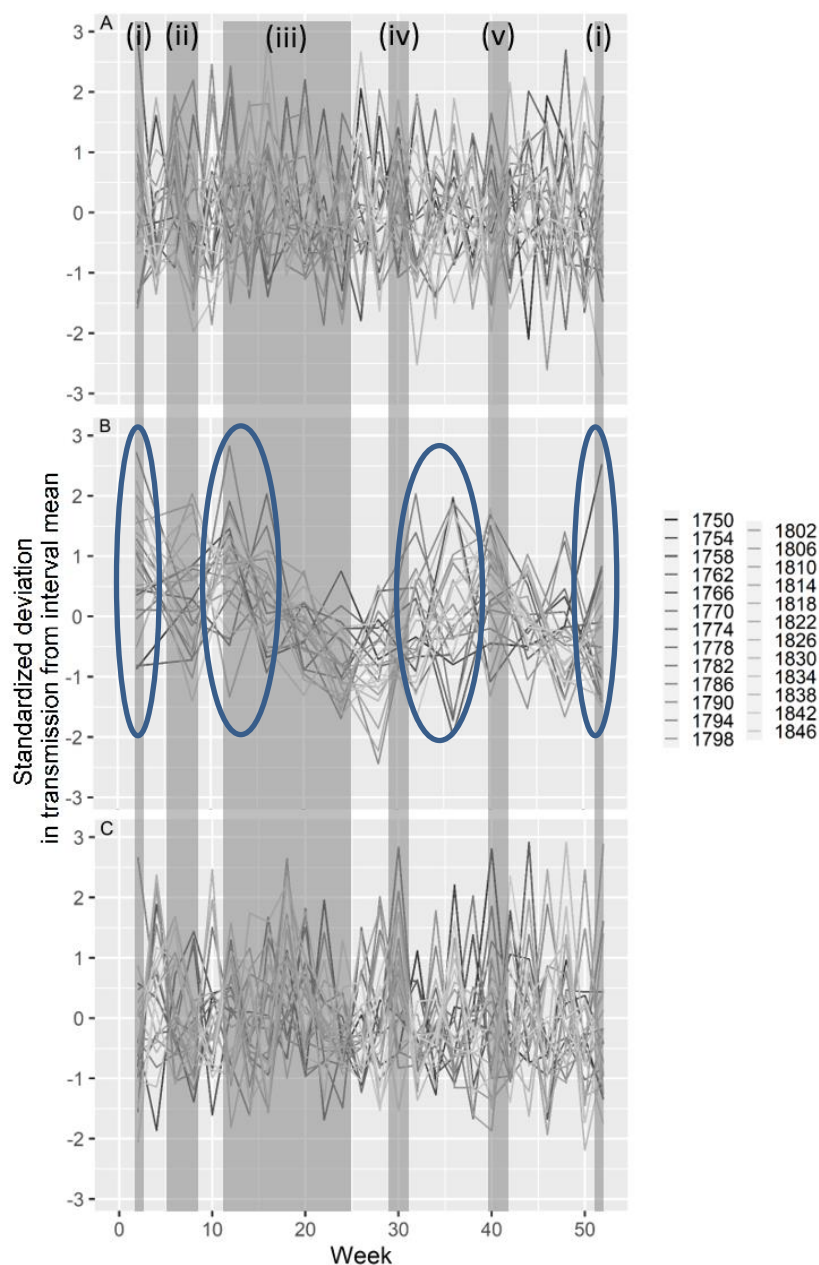

585

586 Fig. 3 Seasonality of transmission rates estimated from tSIR models for (A) smallpox, (B)  
 587 pertussis and (C) measles, showing increases in transmission during New Year in April for  
 588 pertussis, but not for smallpox or measles. Shown on the Y-axis are standardized transmission  
 589 coefficients (i.e.  $(\text{value}-\text{mean})/\text{sd}$ ) per four-year interval. Different lines represent four-year  
 590 intervals ranging from 1750 (black) until 1850 (light grey). Dark grey zones indicate weeks of  
 591 annually recurring seasonal social gathering events with (i) Christmas and New Year, (week 1  
 592 and 52), (ii) Midwinter ('laskiainen'; week 5 to 9), (iii) the spring gatherings of Easter, Vappu,  
 593 Pentecoste and Midsummer (weeks 12 to 25), (iv) summer harvest (week 28 to 32) and (v)  
 594 autumn harvest (week 39 to 44). In (B) blue circles indicate periods with statistically significant  
 595 increases in seasonality

596 **Supplementary information to**  
597 **Seasonality of three childhood infections in a pre-industrial society without schools**

598

599 Michael Briga<sup>1</sup>, Susanna Ukonaho<sup>1</sup>, Jenni E Pettay<sup>1</sup>, Robert J Taylor<sup>3</sup> Tarmo Ketola<sup>2</sup>, Virpi  
600 Lummaa<sup>1</sup>

601 <sup>1</sup> Department of Biology, University of Turku, Turku 20014, Finland

602 <sup>2</sup> Department of Biological and Environmental Science, University of Jyväskylä, P.O. Box 35, FI-  
603 40014 Jyväskylä, Finland

604 <sup>3</sup> Department of Science and Environment, Roskilde University, 4000 Roskilde, Denmark

605

606 **Table of contents**

|     |                                                                                     |    |
|-----|-------------------------------------------------------------------------------------|----|
| 607 | 1. Supplementary Information S1: Infectious disease seasonality per vaccine era     | 23 |
| 608 | based on tSIR models                                                                |    |
| 609 | Fig S1                                                                              |    |
| 610 | 2. Supplementary Information S2: Infectious disease seasonality                     | 24 |
| 611 | based on wavelet analyses                                                           |    |
| 612 | Fig S2                                                                              |    |
| 613 | 3. Supplementary Information S3: Model selection transmission seasonality in Fig. 3 | 25 |
| 614 | Table S1, Table S2                                                                  |    |
| 615 | 4. Supplementary Information S4: GAM correlations and partial residuals             | 29 |
| 616 | of the best-fitting model in Fig. 3                                                 |    |
| 617 | Fig S3                                                                              |    |

618 **Supplementary Information S1: Infectious disease seasonality per vaccine era based on**  
619 **tSIR models**

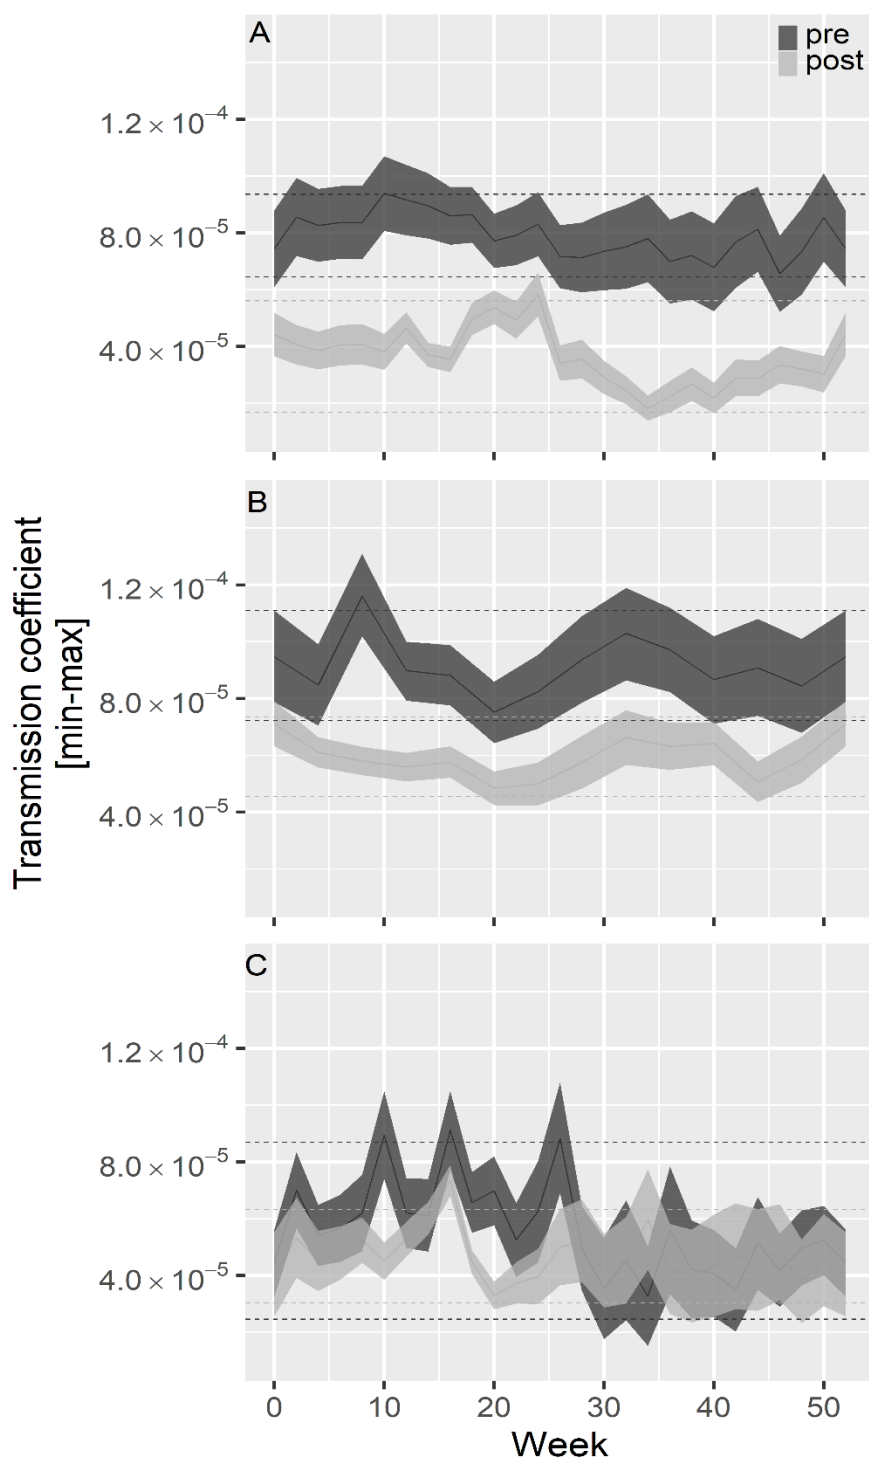

620  
621 Fig. S1 Seasonality of transmission per era estimated from tSIR models for (A) smallpox, (B)  
622 pertussis and (C) measles. Dark grey and light grey lines indicate mean, minimum and  
623 maximum transmission rates for the pre-smallpox-vaccine and the smallpox-vaccine eras  
624 respectively. Horizontal lines show 95% CI for the pre-smallpox-vaccine (dark grey) and the  
625 smallpox-vaccine (light grey) eras.

626 **Supplementary Information S2: Infectious disease seasonality based on wavelet analyses**

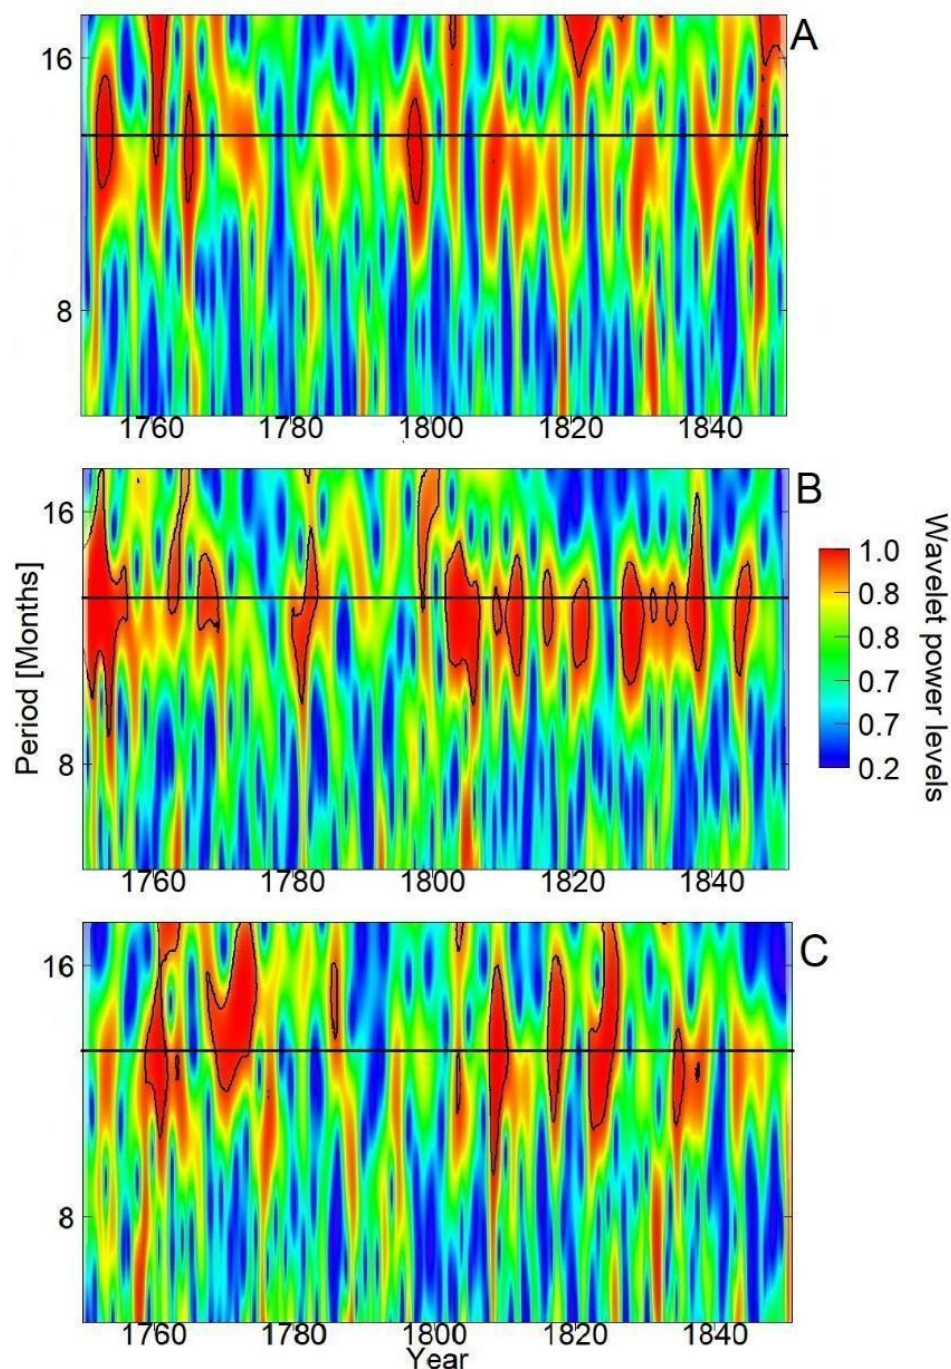

627

628 Fig S2. Wavelet analyses of seasonality of (A) smallpox, (B) pertussis and (C) measles between  
629 1750 and 1850. Legends depict wavelet power levels with red referring to dominant periodicity  
630 and green or blue showing low levels of periodicity. Horizontal black lines denote the period of  
631 one year. Red zones surrounded by black lines indicate statistically significant periodicity at the  
632 5% level.



633 **Supplementary Information S3: Model selection in Fig. 3.**

634 Table S1. Model selection of tri-variate general additive model of tSIR-based transmission rates for the three infections. Predictor variable ‘social’  
 635 captures whether or not week belonged to one of five seasonal social gathering events (six-level factor for five social gathering events and a social  
 636 weeks). To account for a possible climatic seasonal dynamic in the transmission of infection we included daylight as a cubic smoothed term shown in  
 637 the table as  $s(\text{daylight})$ . Co-variation between infection transmission rates remained low, in the best fitting model (model 53): smallpox-measles:  
 638 0.094, pertussis-measles: 0.033 and smallpox-pertussis: 0.0025.

| Model                                                           | Trivariate model terms        |                               |                               | df   | AICc   | $\Delta\text{AICc}$ | weight |
|-----------------------------------------------------------------|-------------------------------|-------------------------------|-------------------------------|------|--------|---------------------|--------|
|                                                                 | Smallpox                      | Measles                       | Pertussis                     |      |        |                     |        |
| <b>Best fitting models (within 4AICc of best fitting model)</b> |                               |                               |                               |      |        |                     |        |
| 53                                                              | <i>intercept</i>              | <i>s(daylight)</i>            | <i>social + s(daylight)</i>   | 26.2 | 1731.2 | 0.0                 | 0.5    |
| 61                                                              | <i>intercept</i>              | <i>intercept</i>              | <i>social + s(daylight)</i>   | 20.7 | 1733.0 | 1.9                 | 0.2    |
| 21                                                              | <i>s(daylight)</i>            | <i>s(daylight)</i>            | <i>social + s(daylight)</i>   | 27.2 | 1733.3 | 2.2                 | 0.2    |
| 29                                                              | <i>s(daylight)</i>            | <i>intercept</i>              | <i>social + s(daylight)</i>   | 21.7 | 1735.2 | 4.0                 | 0.1    |
| <b>All models</b>                                               |                               |                               |                               |      |        |                     |        |
| 1                                                               | social + $s(\text{daylight})$ | social + $s(\text{daylight})$ | social + $s(\text{daylight})$ | 36.2 | 1747.8 | 16.6                | 0.0    |
| 2                                                               | social + $s(\text{daylight})$ | social + $s(\text{daylight})$ | $s(\text{daylight})$          | 30.5 | 1763.7 | 32.5                | 0.0    |
| 3                                                               | social + $s(\text{daylight})$ | social + $s(\text{daylight})$ | social                        | 29.4 | 1860.3 | 129.1               | 0.0    |
| 4                                                               | social + $s(\text{daylight})$ | social + $s(\text{daylight})$ | <i>intercept</i>              | 24.4 | 1870.9 | 139.7               | 0.0    |
| 5                                                               | social + $s(\text{daylight})$ | $s(\text{daylight})$          | social + $s(\text{daylight})$ | 32.2 | 1743.0 | 11.8                | 0.0    |
| 6                                                               | social + $s(\text{daylight})$ | $s(\text{daylight})$          | $s(\text{daylight})$          | 26.7 | 1759.5 | 28.3                | 0.0    |
| 7                                                               | social + $s(\text{daylight})$ | $s(\text{daylight})$          | social                        | 25.2 | 1855.9 | 124.7               | 0.0    |
| 8                                                               | social + $s(\text{daylight})$ | $s(\text{daylight})$          | <i>intercept</i>              | 20.3 | 1866.7 | 135.5               | 0.0    |
| 9                                                               | social + $s(\text{daylight})$ | social                        | social + $s(\text{daylight})$ | 31.7 | 1747.3 | 16.1                | 0.0    |
| 10                                                              | social + $s(\text{daylight})$ | social                        | $s(\text{daylight})$          | 26.3 | 1763.3 | 32.1                | 0.0    |
| 11                                                              | social + $s(\text{daylight})$ | social                        | social                        | 25.0 | 1859.8 | 128.6               | 0.0    |
| 12                                                              | social + $s(\text{daylight})$ | social                        | <i>intercept</i>              | 20.0 | 1870.5 | 139.3               | 0.0    |
| 13                                                              | social + $s(\text{daylight})$ | <i>intercept</i>              | social + $s(\text{daylight})$ | 26.7 | 1744.4 | 13.2                | 0.0    |

|    |                      |                      |                             |      |        |       |     |
|----|----------------------|----------------------|-----------------------------|------|--------|-------|-----|
| 14 | social + s(daylight) | intercept            | s(daylight)                 | 21.3 | 1761.0 | 29.8  | 0.0 |
| 15 | social + s(daylight) | intercept            | social                      | 20.0 | 1857.1 | 125.9 | 0.0 |
| 16 | social + s(daylight) | intercept            | intercept                   | 15.0 | 1868.7 | 137.5 | 0.0 |
| 17 | s(daylight)          | social + s(daylight) | social + s(daylight)        | 31.2 | 1738.3 | 7.1   | 0.0 |
| 18 | s(daylight)          | social + s(daylight) | s(daylight)                 | 25.5 | 1754.4 | 23.2  | 0.0 |
| 19 | s(daylight)          | social + s(daylight) | social                      | 24.4 | 1851.0 | 119.9 | 0.0 |
| 20 | s(daylight)          | social + s(daylight) | intercept                   | 19.4 | 1861.8 | 130.6 | 0.0 |
| 21 | <i>s(daylight)</i>   | <i>s(daylight)</i>   | <i>social + s(daylight)</i> | 27.2 | 1733.3 | 2.2   | 0.2 |
| 22 | s(daylight)          | s(daylight)          | s(daylight)                 | 21.7 | 1750.0 | 18.8  | 0.0 |
| 23 | s(daylight)          | s(daylight)          | social                      | 20.3 | 1846.6 | 115.4 | 0.0 |
| 24 | s(daylight)          | s(daylight)          | intercept                   | 15.5 | 1857.7 | 126.5 | 0.0 |
| 25 | s(daylight)          | social               | social + s(daylight)        | 26.7 | 1738.0 | 6.8   | 0.0 |
| 26 | s(daylight)          | social               | s(daylight)                 | 21.3 | 1754.1 | 23.0  | 0.0 |
| 27 | s(daylight)          | social               | social                      | 20.0 | 1850.7 | 119.5 | 0.0 |
| 28 | s(daylight)          | social               | intercept                   | 15.0 | 1861.5 | 130.4 | 0.0 |
| 29 | <i>s(daylight)</i>   | <i>intercept</i>     | <i>social + s(daylight)</i> | 21.7 | 1735.2 | 4.0   | 0.1 |
| 30 | s(daylight)          | intercept            | s(daylight)                 | 16.3 | 1752.0 | 20.8  | 0.0 |
| 31 | s(daylight)          | intercept            | social                      | 15.0 | 1848.1 | 116.9 | 0.0 |
| 32 | s(daylight)          | intercept            | intercept                   | 10.0 | 1859.8 | 128.7 | 0.0 |
| 33 | social               | social + s(daylight) | social + s(daylight)        | 35.2 | 1745.5 | 14.4  | 0.0 |
| 34 | social               | social + s(daylight) | s(daylight)                 | 29.5 | 1761.5 | 30.3  | 0.0 |
| 35 | social               | social + s(daylight) | social                      | 28.4 | 1858.1 | 126.9 | 0.0 |
| 36 | social               | social + s(daylight) | intercept                   | 23.4 | 1868.7 | 137.5 | 0.0 |
| 37 | social               | s(daylight)          | social + s(daylight)        | 31.2 | 1740.8 | 9.6   | 0.0 |
| 38 | social               | s(daylight)          | s(daylight)                 | 25.7 | 1757.3 | 26.1  | 0.0 |
| 39 | social               | s(daylight)          | social                      | 24.3 | 1853.9 | 122.8 | 0.0 |
| 40 | social               | s(daylight)          | intercept                   | 19.4 | 1864.8 | 133.6 | 0.0 |
| 41 | social               | social               | social + s(daylight)        | 30.7 | 1745.1 | 14.0  | 0.0 |
| 42 | social               | social               | s(daylight)                 | 25.3 | 1761.1 | 30.0  | 0.0 |
| 43 | social               | social               | social                      | 24.0 | 1857.6 | 126.5 | 0.0 |

|    |                  |                      |                             |      |        |       |     |
|----|------------------|----------------------|-----------------------------|------|--------|-------|-----|
| 44 | social           | social               | intercept                   | 19.0 | 1868.4 | 137.2 | 0.0 |
| 45 | social           | intercept            | social + s(daylight)        | 25.7 | 1742.2 | 11.1  | 0.0 |
| 46 | social           | intercept            | s(daylight)                 | 20.3 | 1758.9 | 27.7  | 0.0 |
| 47 | social           | intercept            | social                      | 19.0 | 1855.0 | 123.8 | 0.0 |
| 48 | social           | intercept            | intercept                   | 14.0 | 1866.6 | 135.4 | 0.0 |
| 49 | intercept        | social + s(daylight) | social + s(daylight)        | 30.2 | 1736.1 | 4.9   | 0.0 |
| 50 | intercept        | social + s(daylight) | s(daylight)                 | 24.5 | 1752.2 | 21.0  | 0.0 |
| 51 | intercept        | social + s(daylight) | social                      | 23.4 | 1848.9 | 117.7 | 0.0 |
| 52 | intercept        | social + s(daylight) | intercept                   | 18.4 | 1859.6 | 128.5 | 0.0 |
| 53 | <i>intercept</i> | <i>s(daylight)</i>   | <i>social + s(daylight)</i> | 26.2 | 1731.2 | 0.0   | 0.5 |
| 54 | intercept        | s(daylight)          | s(daylight)                 | 20.7 | 1747.8 | 16.7  | 0.0 |
| 55 | intercept        | s(daylight)          | social                      | 19.4 | 1844.6 | 113.4 | 0.0 |
| 56 | intercept        | s(daylight)          | intercept                   | 14.5 | 1855.6 | 124.4 | 0.0 |
| 57 | intercept        | social               | social + s(daylight)        | 25.7 | 1735.8 | 4.7   | 0.0 |
| 58 | intercept        | social               | s(daylight)                 | 20.3 | 1752.0 | 20.8  | 0.0 |
| 59 | intercept        | social               | social                      | 19.0 | 1848.6 | 117.4 | 0.0 |
| 60 | intercept        | social               | intercept                   | 14.0 | 1859.5 | 128.3 | 0.0 |
| 61 | <i>intercept</i> | <i>intercept</i>     | <i>social + s(daylight)</i> | 20.7 | 1733.0 | 1.9   | 0.2 |
| 62 | intercept        | intercept            | s(daylight)                 | 15.3 | 1749.9 | 18.7  | 0.0 |
| 63 | intercept        | intercept            | social                      | 14.0 | 1846.0 | 114.8 | 0.0 |
| 64 | intercept        | intercept            | intercept                   | 9.0  | 1857.8 | 126.6 | 0.0 |

639

640 Table S2. Model selection of the univariate general additive model of tSIR-based transmission  
 641 rates for (A) smallpox, (B) pertussis and (C) measles. Predictor variable 'social' captures  
 642 whether or not week belonged to one of five seasonal social gathering events (six-level factor  
 643 for five social gathering events and asocial weeks). To account for a possible climatic seasonal  
 644 dynamic in the transmission of infection we included daylight as a cubic smoothed term shown  
 645 in the table as s(daylight). For each infection, the best model is shown in *italic*.

| Model                       | df   | AICc     | $\Delta$ AICc | weight |
|-----------------------------|------|----------|---------------|--------|
| <b>(A) Smallpox</b>         |      |          |               |        |
| <i>social + s(daylight)</i> | 10.0 | -12042.4 | 11.5          | 0.0    |
| s(daylight)                 | 5.0  | -12051.8 | 2.0           | 0.2    |
| social                      | 9.0  | -12044.4 | 9.4           | 0.0    |
| <i>intercept</i>            | 4.0  | -12053.8 | 0.0           | 0.5    |
| era                         | 5.0  | -12051.8 | 2.0           | 0.2    |
| era*social                  | 15.0 | -12037.8 | 16.1          | 0.0    |
| era*s(daylight)             | 6.0  | -12049.8 | 4.0           | 0.1    |
| <b>(B) Pertussis</b>        |      |          |               |        |
| <i>social + s(daylight)</i> | 10.0 | -5984.0  | 0.0           | 1.0    |
| s(daylight)                 | 5.0  | -5976.6  | 7.4           | 0.0    |
| social                      | 9.0  | -5960.6  | 23.3          | 0.0    |
| intercept                   | 4.0  | -5951.9  | 32.1          | 0.0    |
| era                         | 5.0  | -5949.8  | 34.2          | 0.0    |
| era*social                  | 15.0 | -5948.9  | 35.1          | 0.0    |
| era*s(daylight)             | 6.0  | -5946.9  | 37.1          | 0.0    |
| <b>(C) Measles</b>          |      |          |               |        |
| <i>social + s(daylight)</i> | 10.0 | -11219.7 | 3.2           | 0.1    |
| s(daylight)                 | 5.0  | -11220.9 | 2.0           | 0.2    |
| social                      | 9.0  | -11221.1 | 1.8           | 0.2    |
| <i>intercept</i>            | 4.0  | -11222.9 | 0.0           | 0.5    |
| era                         | 5.0  | -11220.9 | 2.0           | 0.2    |
| era*social                  | 15.0 | -11212.8 | 10.1          | 0.0    |
| era*s(daylight)             | 6.0  | -11218.9 | 4.0           | 0.1    |

646

**Supplementary Information S4: GAM correlations and partial residuals of the model in Fig. 3**

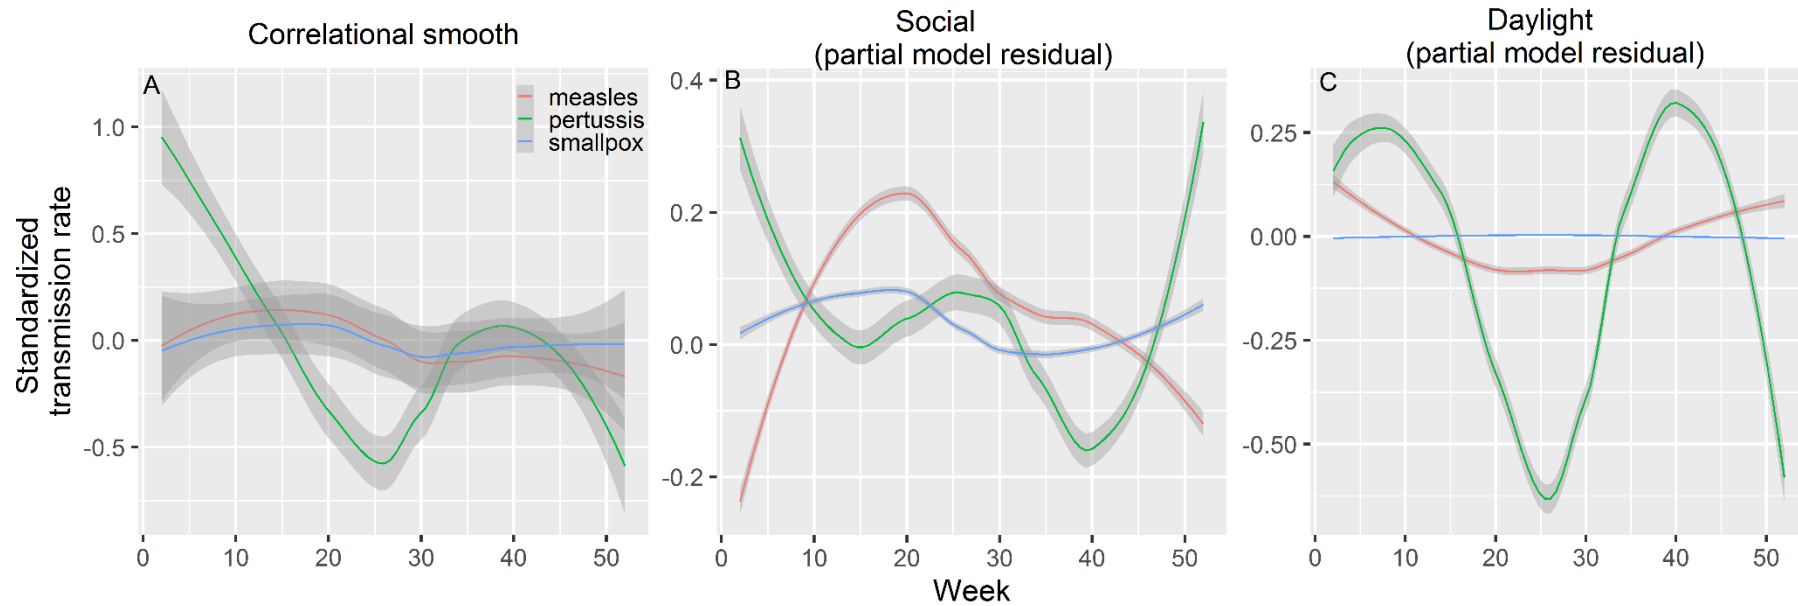

Fig S3. Seasonal changes in standardized transmission rates with (A) data correlation, and (B) and (C) the decomposed contributions (partial residuals) of respectively the social and daylight terms in the full trivariate model (model 1 in Table S2).
